# Supplementary material for: Revealing global risks of labor abuse and illegal, unreported, and unregulated fishing
Source: PubMed Central journal article supplement (PMC8983709; doi:10.1038/s41467-022-28916-2), 2022-04-05
Supplement: 41467_2022_28916_MOESM1_ESM.pdf [file 41467_2022_28916_MOESM1_ESM.pdf]

## **Supplementary Information**

**Supplementary Figures**

**Supplementary Tables**

**Supplementary Note**

**Supplementary References**

## Supplementary Figures

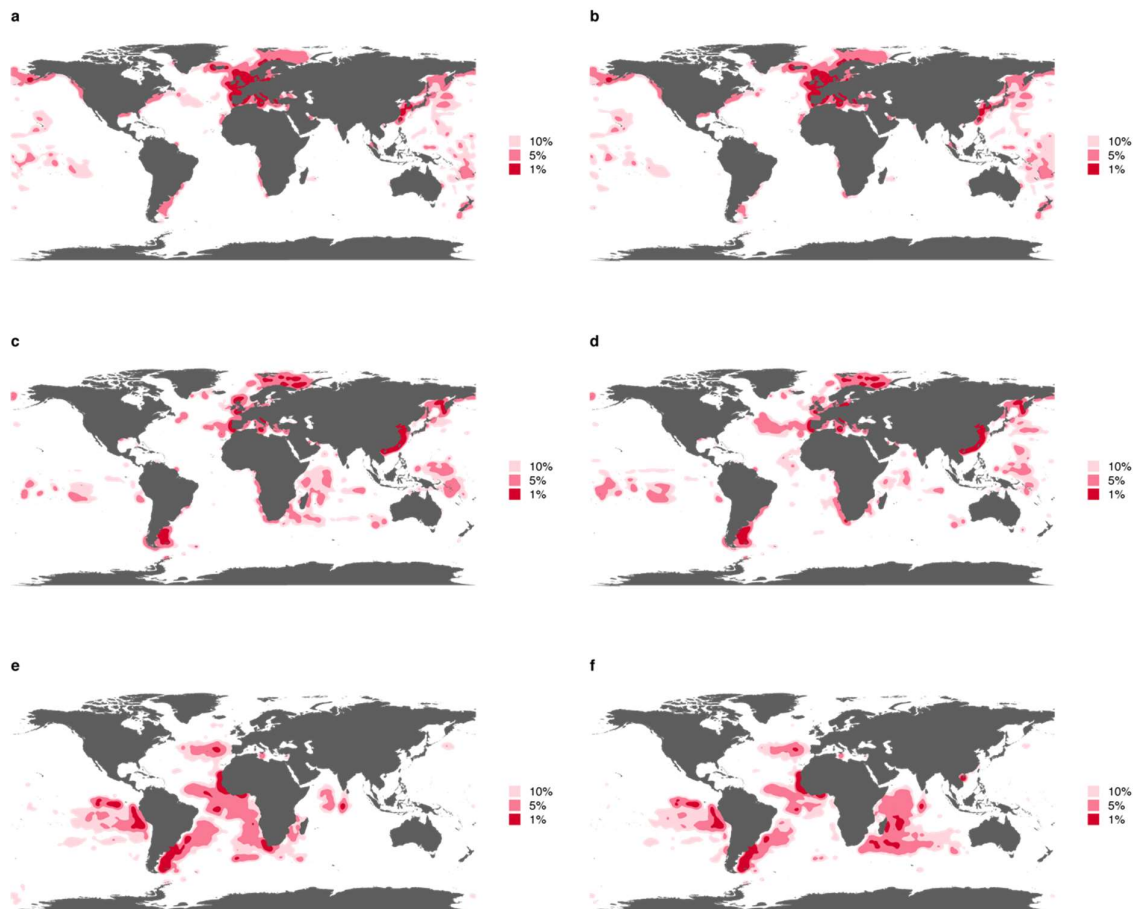

**Supplementary Figure 1. At-sea risk areas for each port risk class.** Risk regions are based on relative fishing effort and observed and predicted port risk according to flag group, gear type, and time-at-sea for fishing vessel trips ending at low-risk ports for (a) labor abuse and (b) IUU fishing, medium-risk ports for (c) labor abuse and (d) IUU fishing, and high-risk ports for (e) labor abuse and (f) IUU fishing. Colors indicate the quantiles of cumulative fishing hours within each risk class (10% = 90% quantile, 5% = 95% quantile, 1% = 99% quantile). Matthews correlation coefficients for classification were 0.62 for labor abuse fishing and 0.65 for IUU fishing.

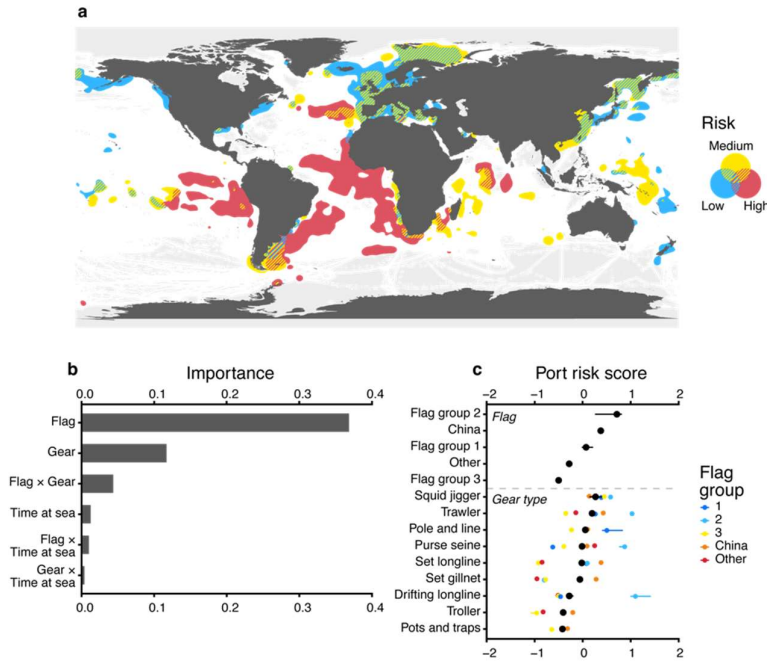

**Supplementary Figure 2. At-sea results for labor abuse using departure port risk score.** (a) The model with the same structure as the one described for arrival port was re-trained using port risk score at departure port. Low-, medium-, and high-risk areas are colored in blue, yellow and red, respectively, and overlaps between risk categories are hashed. Grey at-sea regions indicate no data. We obtained a root-mean-square error 0.88 and Matthews correlation coefficient 0.62 based on  $10 \times 5$ -fold cross validation. (b) Variable importance on fishing vessels' departure port risk for labor abuse. Interactions are represented by 'x' between variables. (c) Effects of each variable on port risk of labor abuse. Black points present the estimated port risk score when the variable is present, calculated by adding the main SHAP (SHapley Additive exPlanations) values (without interaction effects) to the model base line. Numbers in the top flag category represent flag classes as categorized in Supplementary Table 2 based on Ford and Wilcox<sup>1</sup>. For fishing gear type, interactions with flag groups are also shown. For c, points and horizontal lines indicate means and 95% ranges of SHAP values, respectively.

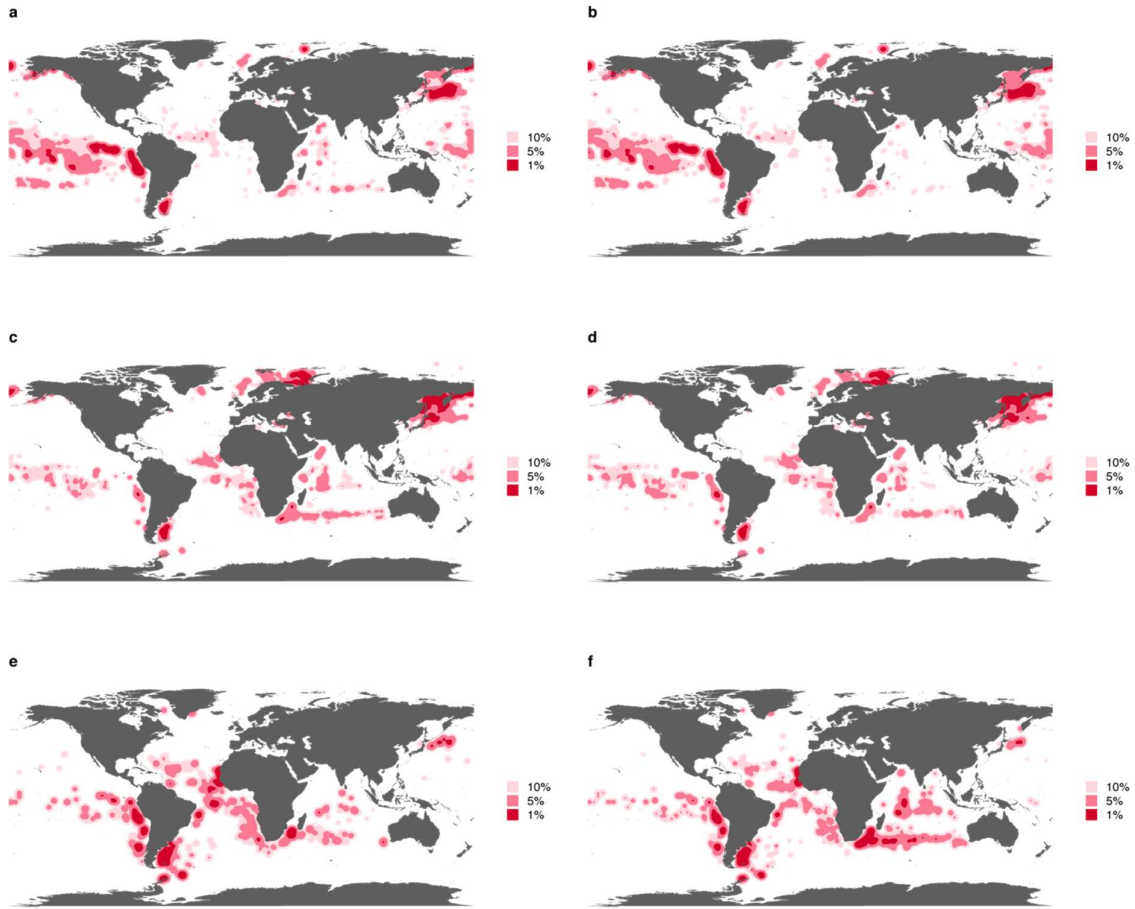

**Supplementary Figure 3. Transshipment risk areas for each port risk class.** Risk regions are based on occurrence of encounter events and observed and predicted port risk by carrier vessels arriving at low-risk ports for (a) labor abuse and (b) IUU fishing, medium-risk ports for (c) labor abuse and (d) IUU fishing, and high-risk ports for (e) labor abuse and (f) IUU fishing. Colors indicate the quantiles of cumulative fishing hours within each risk class (10% = 90% quantile, 5% = 95% quantile, 1% = 99% quantile). Matthews correlation coefficients for classification were 0.49 for labor abuse and 0.45 for IUU fishing.

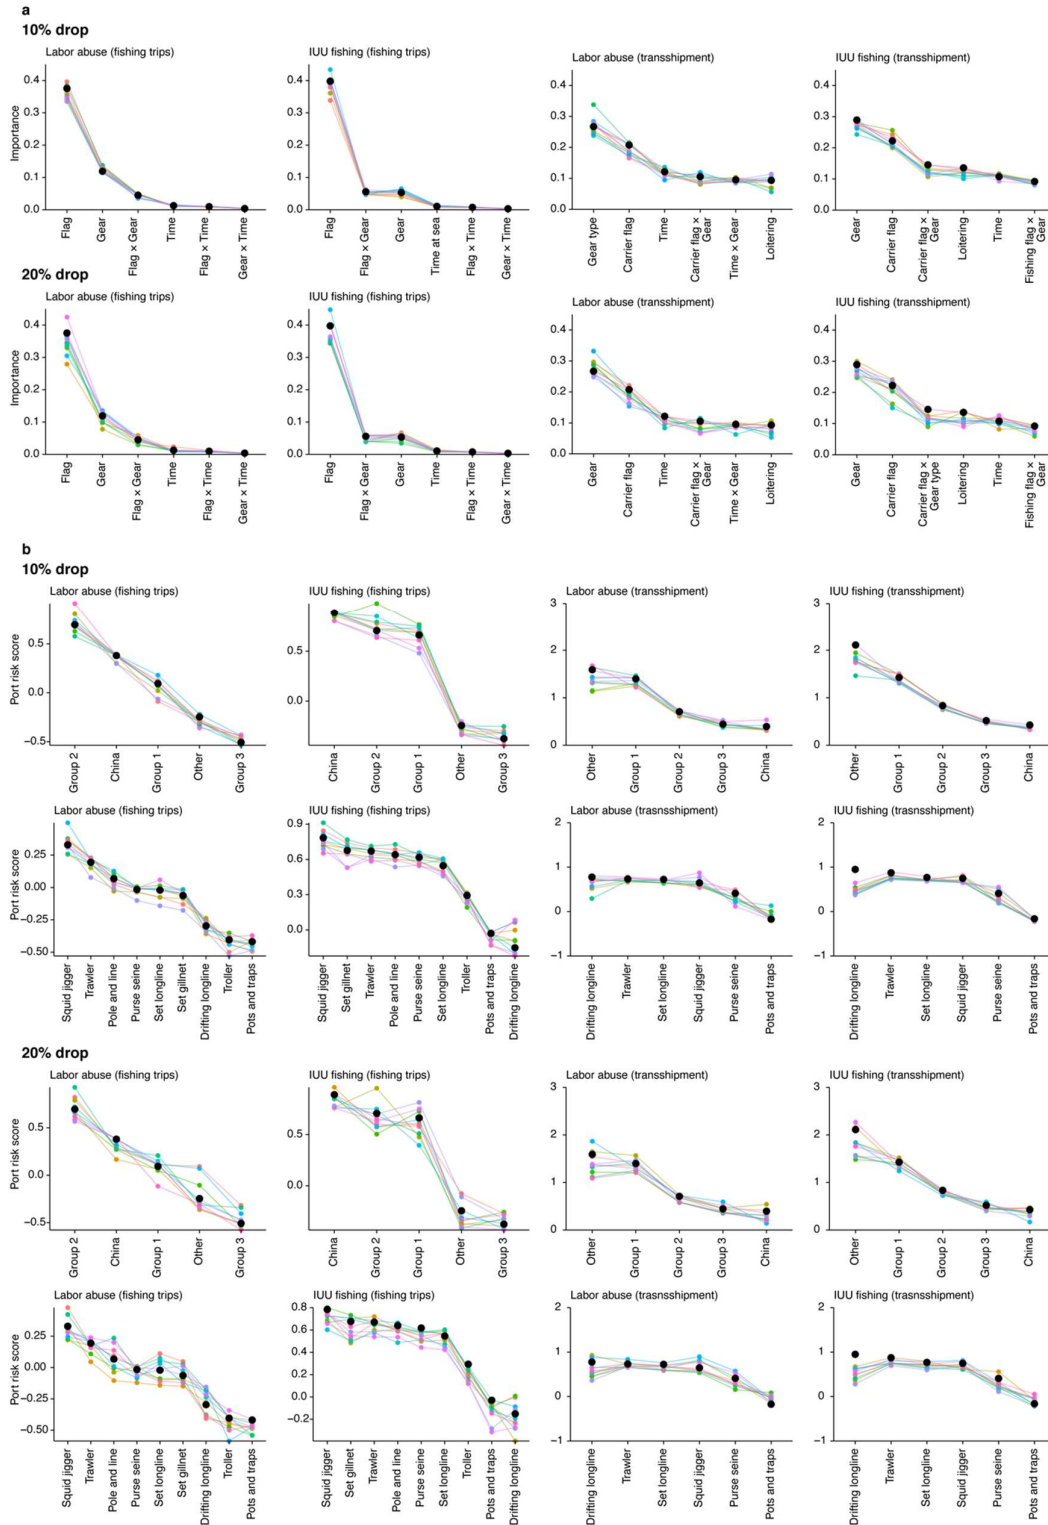

**Supplementary Figure 4. Robustness of port risk scores.** (a) Variable importance on port risk score for labor abuse and IUU fishing for fishing trips and transshipment after subsampling experts' responses on port risk assessment. (b) Effects of variables on port risk score for labor abuse and IUU fishing for fishing trips and transshipment after subsampling experts' responses on port risk assessment. Colors correspond to the results from the same subsampling set (10% or 20% random drop of the data). Black points indicate the original values from the full dataset.

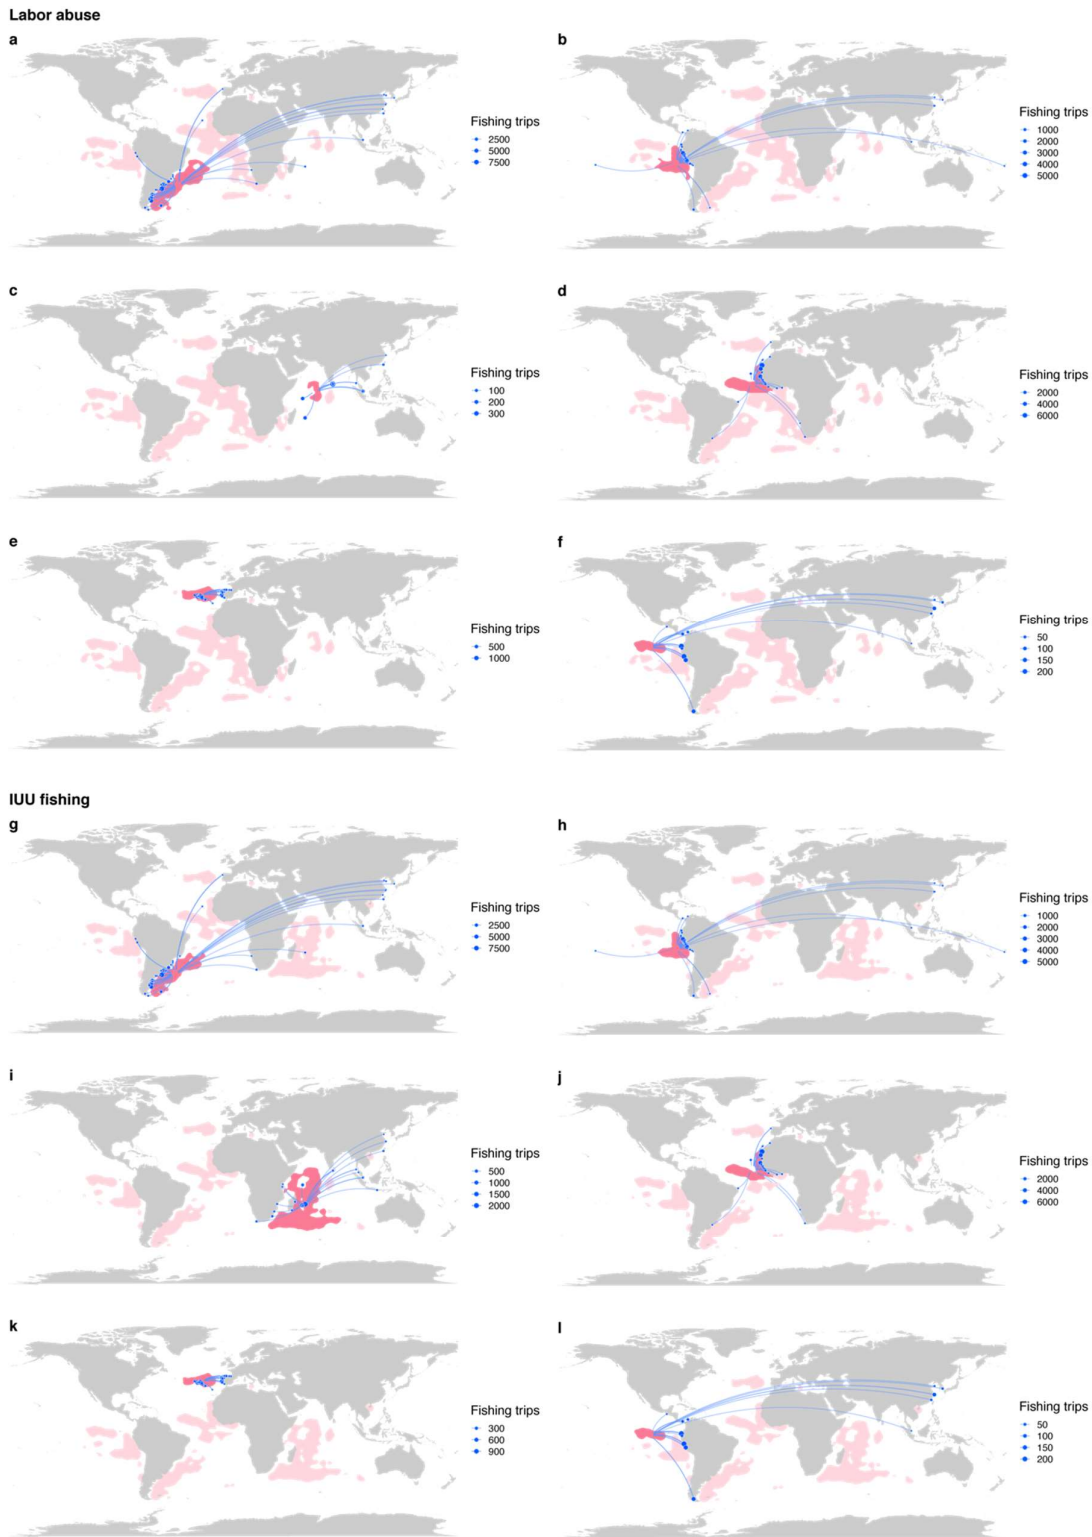

**Supplementary Figure 5. Destination ports for high-risk fishing regions for labor abuse (a–f) and IUU fishing (g–l)** (a) Southwest Atlantic, (b) Humboldt Current, (c) around the Maldives, (d) West Africa, (e) around the Azores, (f) around Galapagos Islands; (g) Southwest Atlantic (h) Humboldt Current, (i) Western Indian Ocean, (j) West Africa, (k) around the Azores, (l) around Galapagos Islands. Ports with at least 10 trips are shown.

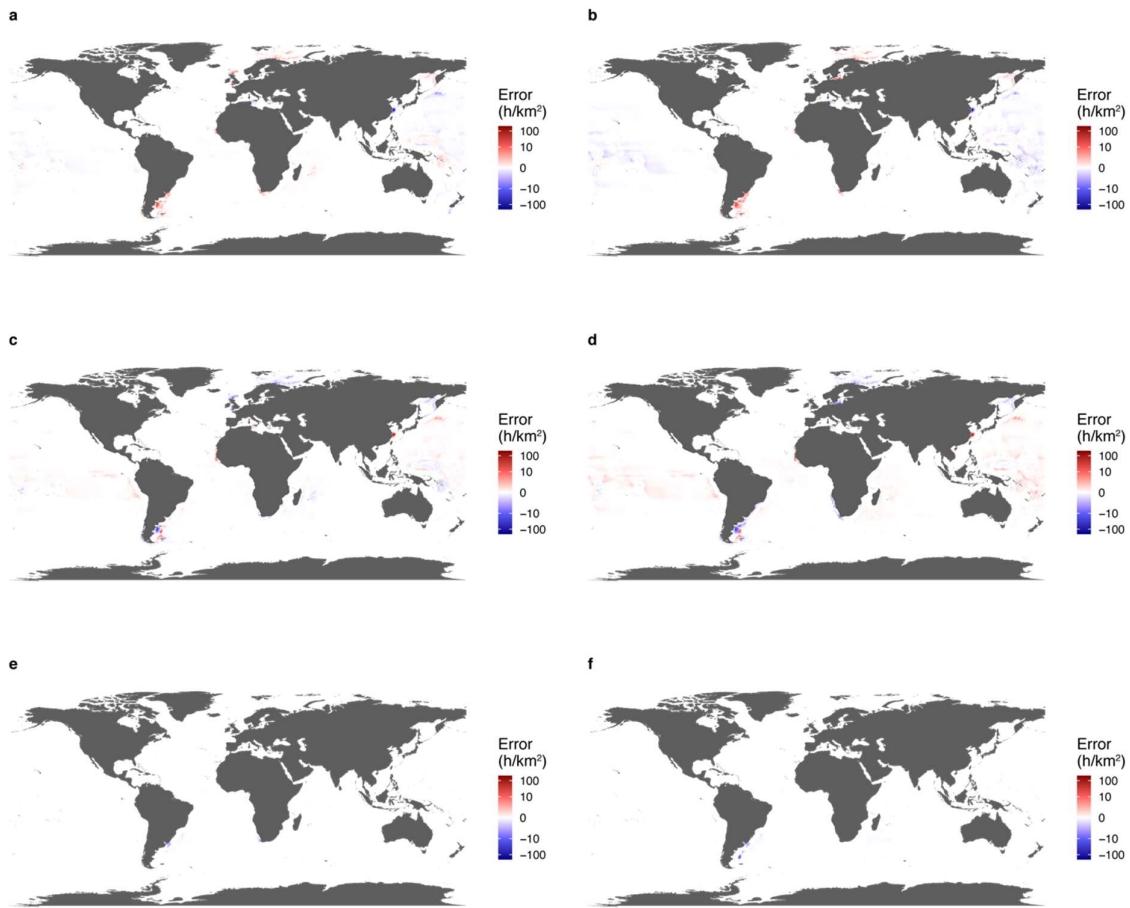

**Supplementary Figure 6. Spatial differences between at-sea risk using the observed port risk score and the corresponding model prediction.** The panels correspond to Supplementary Figure 1. The values represent cumulative fishing hours by area (hours/km<sup>2</sup>) based on the predicted port risk score, minus the corresponding fishing hours based on the observed port risk score for low-risk ports for (a) labor abuse and (b) IUU fishing, medium-risk ports for (c) labor abuse and (d) IUU fishing, and high-risk ports for (e) labor abuse and (f) IUU fishing. Model errors on the observed port risk were mainly reflected in low- and medium-risk areas, with an overestimation (red range) of low-risk fishing off Uruguay, the Baltic Sea, and the Barents Sea and underestimation (blue range) of low-risk fishing in the Pacific region.

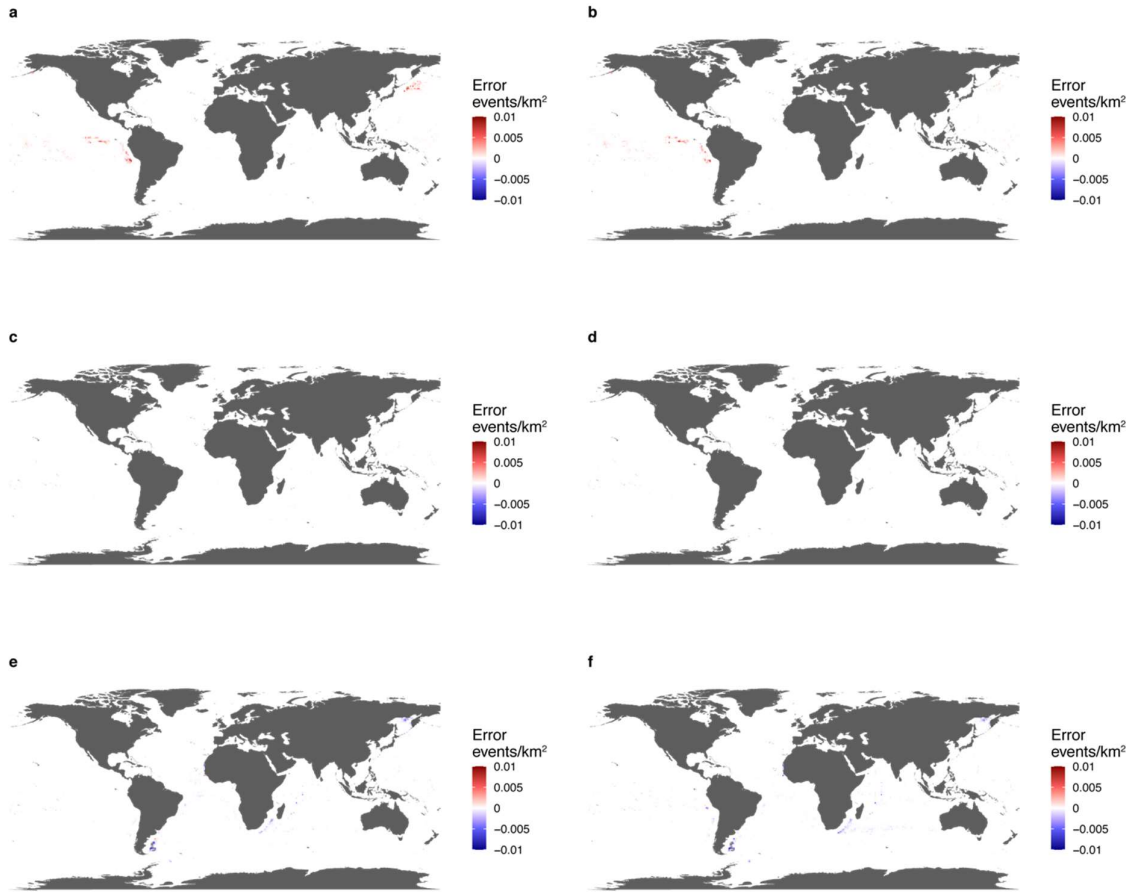

**Supplementary Figure 7. Spatial difference between transshipment risk using the observed port risk score and the corresponding model prediction.** The panels correspond to Supplementary Figure 3. The values represent density by area (no. of events/km<sup>2</sup>) of encounter events based on the predicted port risk score, minus the corresponding density based on the observed port risk score for carrier vessels arriving at low-risk ports for (a) labor abuse and (b) IUU fishing, medium-risk ports for (c) labor abuse and (d) IUU fishing, and high-risk ports for (e) labor abuse and (f) IUU fishing. There is little visible spatial heterogeneity in error. Model errors on the observed port risk were mainly focused in low- and high-risk areas, with an overestimation (red range) of low-risk transshipments off Ecuador and an underestimation (blue range) of high-risk transshipments off Uruguay and South Africa.



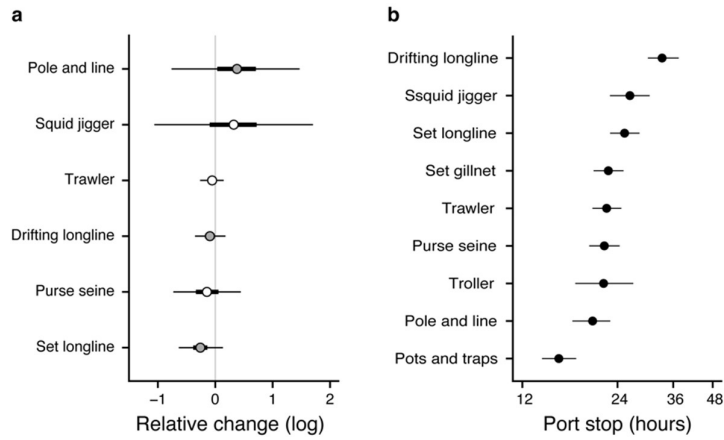

**Supplementary Figure 8. Change in the number of visits by foreign fishing vessels to countries party to PSMA one year post entry into force relative to pre-PSMA period (a) and port stop duration of foreign fishing vessels by fishing gear types (b).** In (a), points are medians of Bayesian posteriors, and thin and thick horizontal lines are 95% and 50% credible intervals (CIs), respectively. Grey points indicate that 50% CIs do not overlap with zero, and white points indicate that 50% CIs do overlap with zero. Pots and traps, trollers and set gillnets were removed from the analysis due to lack of convergence (< 20 observations). In (b), points and horizontal lines represent the best estimates and 95% confidence intervals, respectively.

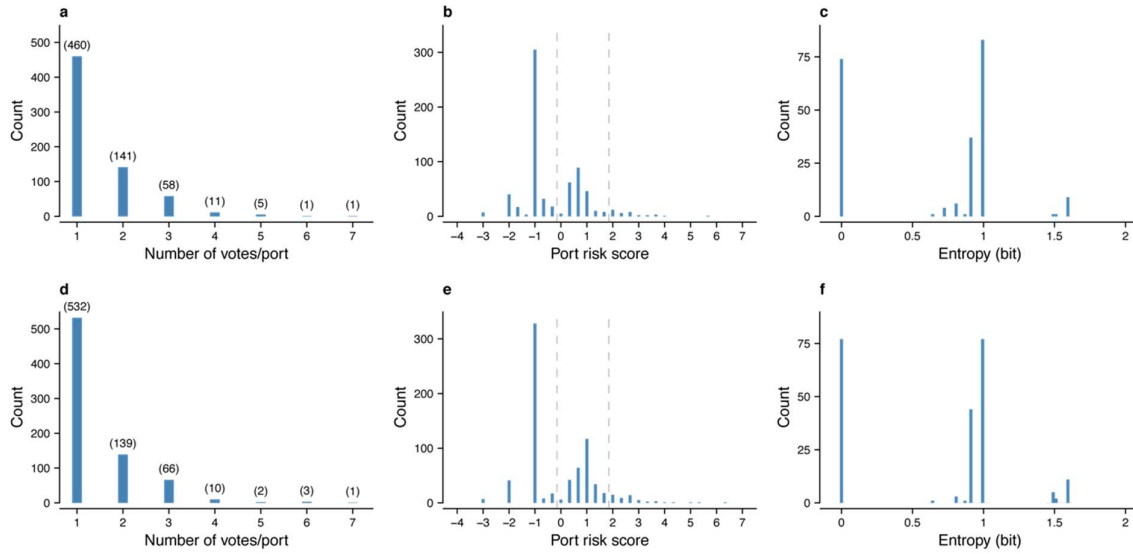

**Supplementary Figure 9. Frequency of votes per port.** Number of votes per port, port risk score, and entropy of votes ( $n \geq 2$ ) for risk of labor abuse (a–c), and of IUU fishing (d–f). (a, b) Values in parentheses indicate frequency. (b, e) Port risk score was calculated as the sum of weighted votes for each port, where each vote was weighted by -1 for not associated, 1/3, 2/3 and 1 for low, medium and high degrees of certainty, respectively. Dashed vertical lines indicate clustering of port risk score into 3 bins (low: risk score < 0, medium:  $0 \leq$  risk score < 2, high: risk score  $\geq$  2) using a univariate k-means method based on the frequency distribution of combined port risk scores. (c, f) When a port received more than one vote, entropy was computed as  $H = -\sum_{i=1}^4 p_i \log_2 p_i$ , where  $p_i$  represents a proportion of level  $i$  (low, medium, high, no association) over all votes. Entropy ranges from 0 to 2, with lower values indicating agreement among votes.

## Supplementary Tables

**Supplementary Table 1.** Summary of the total numbers of respondents and ports per port assessment category for labor abuse and IUU fishing. The total number of ports assessed for labor abuse and IUU fishing includes ports that received multiple assessments with different degrees of certainty from experts so the total number of ports assessed are not equal to the sum of the ports under each category. Not all respondents who took the survey assessed ports for their level of risk, or for both labor abuse and IUU fishing.

|                                       | <b>Observations</b> |
|---------------------------------------|---------------------|
| <b>Respondents</b>                    | <b>76</b>           |
| <b>Ports assessed for labor abuse</b> | <b>677</b>          |
| Not associated                        | 432                 |
| Low degree of certainty               | 175                 |
| Medium degree of certainty            | 163                 |
| High degree of certainty              | 61                  |
| <b>Ports assessed for IUU fishing</b> | <b>753</b>          |
| Not associated                        | 432                 |
| Low degree of certainty               | 118                 |
| Medium degree of certainty            | 151                 |
| High degree of certainty              | 214                 |

**Supplementary Table 2.** Flag categories used in the analysis, adapted from Ford and Wilcox<sup>1</sup>. China was excluded from the original flag group 3 in the analysis and considered separately given its dominance in fishing effort and number of vessels. Countries not included in either category were clustered under a separate class as ‘other’. Flag group 1 corresponds to Cluster 2, Flag group 2 to Cluster 3, and Flag group 3 to Cluster 1 in the original analysis by Ford and Wilcox<sup>1</sup>. States in parentheses are listed in Ford and Wilcox<sup>1</sup>, but lack associated AIS data in the 2012–2019 GFW dataset used for our analyses. We did not include Mongolia and Sao Tome and Príncipe because they were not in the subset of the Global Fishing Watch data we used for modeling. \*Denotes a flag that is designated a Flag of Convenience according to the International Transport Workers’ Federation<sup>2</sup>.

| <b>Flag category</b> | <b>Ford and Wilcox description</b>                                                                                              | <b>State</b>                                                                                                                                                                                                                                                                                                                                                                                                                                                                                                                                                                                                                                                                                                                                                                                                                                                                                                                                                                                                                                                                                                                                                                                                                                      |
|----------------------|---------------------------------------------------------------------------------------------------------------------------------|---------------------------------------------------------------------------------------------------------------------------------------------------------------------------------------------------------------------------------------------------------------------------------------------------------------------------------------------------------------------------------------------------------------------------------------------------------------------------------------------------------------------------------------------------------------------------------------------------------------------------------------------------------------------------------------------------------------------------------------------------------------------------------------------------------------------------------------------------------------------------------------------------------------------------------------------------------------------------------------------------------------------------------------------------------------------------------------------------------------------------------------------------------------------------------------------------------------------------------------------------|
| <b>Flag group 1</b>  | High ownership by countries other than the flag state; low fidelity to flag state EEZ, higher control of corruption             | Antigua and Barbuda*, Barbados*, Cayman Islands*, Liberia*, Saint Vincent and the Grenadines*, Vanuatu*                                                                                                                                                                                                                                                                                                                                                                                                                                                                                                                                                                                                                                                                                                                                                                                                                                                                                                                                                                                                                                                                                                                                           |
| <b>Flag group 2</b>  | Low control of corruption; low fidelity to flag state EEZ; intermediate levels ownership by countries other than the flag state | Bahamas*, Bahrain, Belize*, Bolivia*, (Brunei Darussalam), Cambodia*, Cyprus*, Equatorial Guinea*, (Gabon), Georgia*, Honduras*, Kiribati, Madagascar, Malta*, Marshall Islands*, Panama*, Portugal, Saint Kitts and Nevis*, Samoa, Sierra Leone*, Sri Lanka*, (Tonga*), United Republic of Tanzania*                                                                                                                                                                                                                                                                                                                                                                                                                                                                                                                                                                                                                                                                                                                                                                                                                                                                                                                                             |
| <b>Flag group 3</b>  | Low ownership by countries other than the flag state; highest fidelity to flag state EEZ; intermediate control of corruption    | Albania, Algeria, Angola, (Anguilla), Argentina, Australia, Azerbaijan, (Bangladesh), Belgium, Bermuda*, Brazil, Bulgaria, Cameroon*, Canada, Cape Verde, Chile, Colombia, (Congo), Costa Rica, Croatia, Cuba, Democratic People’s Republic of Korea*, Denmark, Djibouti, Ecuador, Egypt, (Eritrea), Estonia, (Ethiopia), Fiji, Finland, France, Gambia, Germany, Ghana, Greece, Greenland, (Grenada), Guatemala, Guyana, Hong Kong, Iceland, India, Indonesia, Iran, (Iraq), Ireland, Israel, Italy, Japan, Jordan, Kazakhstan, Kenya, (Kuwait), (Lao People’s Democratic Republic), Latvia, (Lebanon*), Libya, Lithuania, (Luxembourg), Malaysia, Maldives, Mauritania, Mauritius*, Mexico, Montenegro, Morocco, Mozambique, (Myanmar*), Namibia, Netherlands, New Zealand, Nigeria, Norway, Oman, Pakistan, Papua New Guinea, (Paraguay), Peru, Philippines, Poland, Qatar, Republic of Korea, Russian Federation, Saudi Arabia, Senegal, Seychelles, Singapore, Slovenia, South Africa, Spain, Sudan, (Suriname), Sweden, Switzerland, (Syrian Arab Republic), Taiwan, Thailand, (Trinidad and Tobago), Tunisia, Turkey, (Turkmenistan), Ukraine, (United Arab Emirates), United Kingdom, United States, Uruguay, Venezuela, Vietnam, (Yemen) |
| <b>China</b>         | n/a                                                                                                                             | China                                                                                                                                                                                                                                                                                                                                                                                                                                                                                                                                                                                                                                                                                                                                                                                                                                                                                                                                                                                                                                                                                                                                                                                                                                             |
| <b>Other</b>         | n/a                                                                                                                             | Afghanistan, Aruba, Austria, Bhutan, Comoros*, Cook Islands*, Côte d’Ivoire, Curaçao*,                                                                                                                                                                                                                                                                                                                                                                                                                                                                                                                                                                                                                                                                                                                                                                                                                                                                                                                                                                                                                                                                                                                                                            |

---

Dominica, El Salvador, Falkland Islands, Faroe Islands\*, French Guiana, Federated States of Micronesia, French Polynesia, French Southern Territories, Gibraltar\*, Guinea, Guinea-Bissau, Hungary, Jamaica\*, Lesotho, Moldova\*, Nauru, New Caledonia, Nicaragua, Niue, Palau\*, Palestine, Réunion, Romania, Saint Pierre and Miquelon, Serbia, Solomon Islands, Somalia, Togo\*, Turks and Caicos Islands, Tuvalu, Wallis and Futuna

---

**Supplementary Table 3.** Summary of model input for fishing trips and risk of labor abuse, by gear type and for each flag category, at arrival ports. Values indicate the number of trips, total number of fishing hours and the number of unique ports in each flag group category. Values in parentheses represent the Shannon equitability index, calculated as  $E = -\sum_{i=1}^N p_i \ln p_i / \ln N$ , where  $N$  is the total number of unique ports and  $p_i$  is the proportion of the occurrence of port  $i$  within a flag  $\times$  gear category. The score ranges from 0 to 1, with larger values indicating that frequencies of unique ports are more evenly distributed within a category. Flag groups are in Supplementary Table 2.

| <b>Gear type</b>   | <b>Flag group 1</b> | <b>Flag group 2</b> | <b>Flag group 3</b> | <b>China</b>   | <b>Other</b>   |
|--------------------|---------------------|---------------------|---------------------|----------------|----------------|
| Drifting longlines | 550 trips           | 577 trips           | 32,578 trips        | 4,801 trips    | 624 trips      |
|                    | 779,489 hours       | 178,086 hours       | 11,270,168          | 4,163,521      | 229,521 hours  |
|                    | 12 ports            | 24 ports            | 152 ports           | 40 ports       | 22 ports       |
|                    | ( $E = 0.58$ )      | ( $E = 0.61$ )      | ( $E = 0.57$ )      | ( $E = 0.56$ ) | ( $E = 0.57$ ) |
| Pole and line      | 7 trips             | NA                  | 11,128 trips        | 3,181 trips    | NA             |
|                    | 936 hours           |                     | 192,992 hours       | 52,707 hours   |                |
|                    | 3 ports             |                     | 142 ports           | 13 ports       |                |
|                    | ( $E = 0.87$ )      |                     | ( $E = 0.6$ )       | ( $E = 0.64$ ) |                |
| Pots and traps     | NA                  | 1 trip              | 15,264 trips        | 10,695 trips   | 1 trip         |
|                    |                     | 335 hours           | 329,662 hours       | 36,379 hours   | < 1 hour       |
|                    |                     | 1 port              | 82 ports            | 12 ports       | 1 port         |
|                    |                     | ( $E = NA$ )        | ( $E = 0.70$ )      | ( $E = 0.47$ ) | ( $E = NA$ )   |
| Purse seines       | 47 trips            | 1,032 trips         | 79,097 trips        | 21,453 trips   | 1,394 trips    |
|                    | 2,924 hours         | 51,702 hours        | 907,754 hours       | 132,652 hours  | 69,387 hours   |
|                    | 9 ports             | 37 ports            | 238 ports           | 34 ports       | 44 ports       |
|                    | ( $E = 0.74$ )      | ( $E = 0.73$ )      | ( $E = 0.76$ )      | ( $E = 0.57$ ) | ( $E = 0.74$ ) |
| Set gillnets       | NA                  | 135 trips           | 83,343 trips        | 180,537 trips  | 413 trips      |
|                    |                     | 1,442 hours         | 587,664 hours       | 1,179,638      | 950 hours      |
|                    |                     | 3 ports             | 120 ports           | 17 ports       | 4 ports        |
|                    |                     | ( $E = 0.38$ )      | ( $E = 0.52$ )      | ( $E = 0.58$ ) | ( $E = 0.69$ ) |
| Set longlines      | 32 trips            | 133 trips           | 84,306 trips        | 125,122 trips  | 1,266 trips    |
|                    | 222 hours           | 1,905 hours         | 2,024,528           | 1,066,917      | 174,550 hours  |
|                    | 3 ports             | 23 ports            | 221 ports           | 37 ports       | 18 ports       |
|                    | ( $E = 0.63$ )      | ( $E = 0.63$ )      | ( $E = 0.53$ )      | ( $E = 0.52$ ) | ( $E = 0.26$ ) |
| Squid jiggers      | 175 trips           | 41 trips            | 4,199 trips         | 3,960 trips    | NA             |
|                    | 18,115 hours        | 10,037 hours        | 669,775 hours       | 1,827,458      |                |
|                    | 7 ports             | 12 ports            | 40 ports            | 29 ports       |                |
|                    | ( $E = 0.82$ )      | ( $E = 0.91$ )      | ( $E = 0.63$ )      | ( $E = 0.61$ ) |                |
| Trawlers           | 116 trips           | 2,124 trips         | 230,854 trips       | 893,306 trips  | 5,068 trips    |
|                    | 10,141 hours        | 144,368 hours       | 11,298,989          | 15,399,480     | 640,282 hours  |
|                    | 6 ports             | 29 ports            | 299 ports           | 57 ports       | 35 ports       |
|                    | ( $E = 0.26$ )      | ( $E = 0.48$ )      | ( $E = 0.71$ )      | ( $E = 0.47$ ) | ( $E = 0.58$ ) |
| Trollers           | NA                  | NA                  | 2,850 trips         | 384 trips      | 3 trips        |
|                    |                     |                     | 52,168 hours        | 4,188 hours    | < 1 hour       |
|                    |                     |                     | 36 ports            | 10 ports       | 1 port         |
|                    |                     |                     | ( $E = 0.72$ )      | ( $E = 0.74$ ) | ( $E = NA$ )   |

**Supplementary Table 4.** Summary of model input for fishing trips and risk of IUU fishing, by gear type and for each flag category, at arrival ports. Values indicate the number of trips, total number of fishing hours, the number of ports, and evenness of the frequency of the unique ports in each flag group category. Values in parentheses represent the Shannon equitability index, calculated as  $E = -\sum_{i=1}^N p_i \ln p_i / \ln N$ , where  $N$  is the total number of unique ports and  $p_i$  is the proportion of the occurrence of port  $i$  within a flag  $\times$  gear category. The score ranges from 0 to 1, with larger values indicating that frequencies of unique ports are more evenly distributed within a category. Flag groups are in Supplementary Table 2.

| <b>Gear type</b>   | <b>Flag group 1</b> | <b>Flag group 2</b> | <b>Flag group 3</b> | <b>China</b>   | <b>Other</b>   |
|--------------------|---------------------|---------------------|---------------------|----------------|----------------|
| Drifting longlines | 552 trips           | 651 trips           | 32,952 trips        | 5,162 trips    | 628 trips      |
|                    | 785,486 hours       | 231,204 hours       | 11,570,660          | 4,391,529      | 229,521 hours  |
|                    | 13 ports            | 29 ports            | 160 ports           | 56 ports       | 24 ports       |
|                    | ( $E = 0.57$ )      | ( $E = 0.64$ )      | ( $E = 0.57$ )      | ( $E = 0.57$ ) | ( $E = 0.56$ ) |
| Pole and line      | 15 trips            | NA                  | 11,868 trips        | 13,267 trips   | NA             |
|                    | 2,332 hours         |                     | 237,899 hours       | 106,149 hours  |                |
|                    | 3 ports             |                     | 145 ports           | 31 ports       |                |
|                    | ( $E = 0.84$ )      |                     | ( $E = 0.62$ )      | ( $E = 0.64$ ) |                |
| Pots and traps     | NA                  | 1 trip              | 13,586 trips        | 14,294 trips   | 1 trip         |
|                    |                     | 335 hours           | 241,077 hours       | 67,068 hours   | < 1 hour       |
|                    |                     | 1 port              | 82 ports            | 32 ports       | 1 port         |
|                    |                     | ( $E = NA$ )        | ( $E = 0.68$ )      | ( $E = 0.57$ ) | ( $E = NA$ )   |
| Purse seines       | 48 trips            | 944 trips           | 83,694 trips        | 36,487 trips   | 1,245 trips    |
|                    | 2,924 hours         | 45,101 hours        | 924,874 hours       | 193,688 hours  | 61,566 hours   |
|                    | 10 ports            | 39 ports            | 257 ports           | 58 ports       | 42 ports       |
|                    | ( $E = 0.73$ )      | ( $E = 0.72$ )      | ( $E = 0.76$ )      | ( $E = 0.67$ ) | ( $E = 0.72$ ) |
| Set gillnets       | NA                  | 176 trips           | 83,874 trips        | 346,068 trips  | 413 trips      |
|                    |                     | 2,437 hours         | 580,807 hours       | 2,779,464      | 950 hours      |
|                    |                     | 5 ports             | 135 ports           | 38 ports       | 4 ports        |
|                    |                     | ( $E = 0.55$ )      | ( $E = 0.52$ )      | ( $E = 0.7$ )  | ( $E = 0.69$ ) |
| Set longlines      | 36 trips            | 231 trips           | 84,390 trips        | 271,379 trips  | 1,259 trips    |
|                    | 222 hours           | 10,887 hours        | 2,001,373           | 2,259,801      | 174,132 hours  |
|                    | 4 ports             | 29 ports            | 239 ports           | 62 ports       | 17 ports       |
|                    | ( $E = 0.70$ )      | ( $E = 0.65$ )      | ( $E = 0.52$ )      | ( $E = 0.67$ ) | ( $E = 0.25$ ) |
| Squid jiggers      | 211 trips           | 46 trips            | 5,710 trips         | 5,449 trips    | NA             |
|                    | 18,348 hours        | 10,047 hours        | 860,719 hours       | 1,997,480      |                |
|                    | 10 ports            | 15 ports            | 46 ports            | 45 ports       |                |
|                    | ( $E = 0.82$ )      | ( $E = 0.91$ )      | ( $E = 0.64$ )      | ( $E = 0.66$ ) |                |
| Trawlers           | 483 trips           | 2,270 trips         | 259,144 trips       | 1,701,857      | 5,120 trips    |
|                    | 49,234 hours        | 148,333 hours       | 12,721,018          | 26,928,459     | 636,932 hours  |
|                    | 9 ports             | 32 ports            | 334 ports           | 81 ports       | 34 ports       |
|                    | ( $E = 0.34$ )      | ( $E = 0.52$ )      | ( $E = 0.71$ )      | ( $E = 0.60$ ) | ( $E = 0.60$ ) |
| Trollers           | NA                  | NA                  | 2,851 trips         | 716 trips      | 3 trips        |
|                    |                     |                     | 52,168 hours        | 6,754 hours    | < 1 hour       |
|                    |                     |                     | 37 ports            | 25 ports       | 1 port         |
|                    |                     |                     | ( $E = 0.71$ )      | ( $E = 0.77$ ) | ( $E = NA$ )   |

**Supplementary Table 5.** Summary of model input for carrier vessel trips that were classified as having encounters and risk of labor abuse at arrival ports, for each flag group and with and without loitering. Values indicate the number of trips by carrier vessels, the occurrence of loitering, the number of ports and the evenness of the frequency of unique ports in each flag group category as measured by the Shannon equitability index (see caption in Supplementary Tables 3 and 4 for how the index was calculated).

| <b>Loitering</b> | <b>Flag group 1</b> | <b>Flag group 2</b> | <b>Flag group 3</b> | <b>China</b>       | <b>Other</b>       |
|------------------|---------------------|---------------------|---------------------|--------------------|--------------------|
| Yes              | 233 trips           | 509 trips           | 1,514 trips         | 67 trips           | 47 trips           |
|                  | 31 ports            | 41 ports            | 29 ports            | 8 ports            | 13 ports           |
|                  | ( <i>E</i> = 0.79)  | ( <i>E</i> = 0.76)  | ( <i>E</i> = 0.38)  | ( <i>E</i> = 0.63) | ( <i>E</i> = 0.90) |
| No               | 24 trips            | 39 trips            | 789 trips           | 2 trips            | 5 trips            |
|                  | 6 ports             | 12 ports            | 29 ports            | 1 port             | 2 ports            |
|                  | ( <i>E</i> = 0.78)  | ( <i>E</i> = 0.80)  | ( <i>E</i> = 0.53)  | ( <i>E</i> = NA)   | ( <i>E</i> = 0.97) |



**Supplementary Table 6.** Summary of the model input for carrier vessel trips that were classified as having encounters and risk of IUU fishing at arrival ports, for each flag group and with and without loitering. The values indicate the number of trips by carrier vessels, the occurrence of loitering, the number of ports and the evenness of the frequency of the unique ports in each flag group category as measured by the Shannon equitability index (see caption in Supplementary Tables 3 and 4 for how the index was calculated).

| <b>Loitering</b> | <b>Flag group 1</b> | <b>Flag group 2</b> | <b>Flag group 3</b> | <b>China</b>       | <b>Other</b>       |
|------------------|---------------------|---------------------|---------------------|--------------------|--------------------|
| Yes              | 257 trips           | 555 trips           | 1,572 trips         | 79 trips           | 45 trips           |
|                  | 34 ports            | 45 ports            | 32 ports            | 11 ports           | 12 ports           |
|                  | ( <i>E</i> = 0.80)  | ( <i>E</i> = 0.77)  | ( <i>E</i> = 0.40)  | ( <i>E</i> = 0.70) | ( <i>E</i> = 0.90) |
| No               | 24 trips            | 41 trips            | 806 trips           | 2 trips            | 5 trips            |
|                  | 6 ports             | 14 ports            | 32 ports            | 1 port             | 2 ports            |
|                  | ( <i>E</i> = 0.78)  | ( <i>E</i> = 0.81)  | ( <i>E</i> = 0.54)  | ( <i>E</i> = NA)   | ( <i>E</i> = 0.97) |

**Supplementary Table 7.** Proportion of flag states over all known flag states in high-risk regions for labor abuse based on total fishing hours (2012–2019) for regions identified in Supplementary Figure 5: (a) Southwest Atlantic, (b) Humboldt Current, (c) around Maldives, (d) West Africa, (e) around the Azores, and (f) around the Galapagos Islands.

**a**

| <b>Flag State</b> | <b>Proportion</b> |
|-------------------|-------------------|
| Argentina         | 0.59              |
| Uruguay           | 0.23              |
| Taiwan            | 0.03              |
| Brazil            | 0.03              |
| Spain             | 0.03              |
| South Korea       | 0.03              |
| Other             | 0.05              |

**b**

| <b>Flag State</b> | <b>Proportion</b> |
|-------------------|-------------------|
| Peru              | 0.87              |
| Other             | 0.13              |

**c**

| <b>Flag State</b> | <b>Proportion</b> |
|-------------------|-------------------|
| Taiwan            | 0.45              |
| Sri Lanka         | 0.31              |
| China             | 0.10              |
| Seychelles        | 0.07              |
| South Korea       | 0.02              |
| Other             | 0.05              |

**d**

| <b>Flag State</b> | <b>Proportion</b> |
|-------------------|-------------------|
| Morocco           | 0.37              |
| Spain             | 0.14              |
| China             | 0.09              |
| Senegal           | 0.07              |
| Russia            | 0.03              |
| Mauritania        | 0.03              |
| Norway            | 0.02              |
| Belize            | 0.02              |
| Comoros           | 0.02              |
| Guinea-Bissau     | 0.02              |
| Italy             | 0.01              |
| Curaçao           | 0.01              |
| France            | 0.01              |
| Japan             | 0.01              |
| Cameroon          | 0.01              |
| Portugal          | 0.01              |
| Netherlands       | 0.01              |
| South Korea       | 0.01              |
| Indonesia         | 0.01              |
| Turkey            | 0.01              |
| Lithuania         | 0.01              |
| Georgia           | 0.01              |
| St. Kitts & Nevis | 0.01              |
| Other             | 0.05              |

**e**

| <b>Flag State</b> | <b>Proportion</b> |
|-------------------|-------------------|
| Portugal          | 0.74              |
| Other             | 0.26              |

**f**

| <b>Flag State</b> | <b>Proportion</b> |
|-------------------|-------------------|
| China             | 0.57              |
| Colombia          | 0.13              |
| Ecuador           | 0.09              |
| Panama            | 0.04              |
| Spain             | 0.04              |
| Venezuela         | 0.03              |
| Taiwan            | 0.03              |
| Other             | 0.07              |

**Supplementary Table 8.** Proportion of known flag states in high-risk regions for IUU fishing based on total fishing hours (2012–2019) for regions identified in Supplementary Figure 5: (a) Southwest Atlantic, (b) Humboldt Current, (c) Western Indian Ocean, (d) West Africa, (e) around the Azores, and (f) around the Galapagos Islands.

**a**

| <b>Flag State</b> | <b>Proportion</b> |
|-------------------|-------------------|
| Argentina         | 0.59              |
| Uruguay           | 0.23              |
| Taiwan            | 0.03              |
| Brazil            | 0.03              |
| Spain             | 0.03              |
| South Korea       | 0.03              |
| Other             | 0.05              |

**b**

| <b>Flag State</b> | <b>Proportion</b> |
|-------------------|-------------------|
| Peru              | 0.87              |
| Other             | 0.13              |

**c**

| <b>Flag State</b> | <b>Proportion</b> |
|-------------------|-------------------|
| Taiwan            | 0.29              |
| France            | 0.25              |
| Mauritius         | 0.11              |
| China             | 0.08              |
| Sri Lanka         | 0.06              |
| Madagascar        | 0.05              |
| Japan             | 0.03              |
| Seychelles        | 0.03              |
| South Korea       | 0.03              |
| Other             | 0.07              |

**d**

| <b>Flag State</b> | <b>Proportion</b> |
|-------------------|-------------------|
| Morocco           | 0.37              |
| Spain             | 0.14              |
| China             | 0.09              |
| Senegal           | 0.07              |
| Russia            | 0.03              |
| Mauritania        | 0.03              |
| Norway            | 0.02              |
| Belize            | 0.02              |
| Comoros           | 0.02              |
| Guinea-Bissau     | 0.02              |
| Italy             | 0.01              |
| Curaçao           | 0.01              |
| France            | 0.01              |
| Cameroon          | 0.01              |
| Japan             | 0.01              |
| Netherlands       | 0.01              |
| South Korea       | 0.01              |
| Portugal          | 0.01              |
| Indonesia         | 0.01              |
| Turkey            | 0.01              |
| Lithuania         | 0.01              |
| Georgia           | 0.01              |
| Other             | 0.05              |

**e**

| <b>Flag State</b> | <b>Proportion</b> |
|-------------------|-------------------|
| Portugal          | 0.71              |
| Other             | 0.29              |

**f**

| <b>Flag State</b> | <b>Proportion</b> |
|-------------------|-------------------|
| China             | 0.58              |
| Colombia          | 0.13              |
| Ecuador           | 0.09              |
| Panama            | 0.04              |
| Spain             | 0.04              |
| Venezuela         | 0.03              |
| Taiwan            | 0.03              |
| Other             | 0.07              |

**Supplementary Table 9.** Top 20 destination ports in high-risk regions for labor abuse (with number of trips  $\geq 10$ ) for regions identified in Supplementary Figure 5: **(a)** Southwest Atlantic, **(b)** Humboldt Current, **(c)** around Maldives, **(d)** West Africa, **(e)** around the Azores, and **(f)** around the Galapagos Islands. Port names are from Global Fishing Watch.

**a**

| <b>Country</b>   | <b>Port</b>        | <b>Trips</b> | <b>%</b> |
|------------------|--------------------|--------------|----------|
| Uruguay          | Montevideo         | 9,453        | 23.6     |
| Argentina        | Mar Del Plata      | 7,593        | 19.0     |
| Argentina        | Puerto Madryn      | 5,581        | 13.9     |
| Argentina        | Puerto Deseado     | 3,727        | 9.3      |
| Argentina        | Camarones          | 2,154        | 5.4      |
| Brazil           | Rio Grande         | 1,874        | 4.7      |
| Falkland Islands | Stanley            | 1,335        | 3.3      |
| Falkland Islands | Berkeley Sound     | 1,096        | 2.7      |
| Argentina        | Comodoro Rivadavia | 990          | 2.5      |
| Argentina        | San Antonio Este   | 875          | 2.2      |
| Argentina        | Puerto Rawson      | 788          | 2.0      |
| Argentina        | Caleta Paula       | 556          | 1.4      |
| Uruguay          | Recalada           | 462          | 1.2      |
| Uruguay          | Punta Del Este     | 420          | 1.0      |
| Brazil           | Itajai             | 331          | 0.8      |
| South Africa     | Cape Town          | 286          | 0.7      |
| Argentina        | Caleta Olivia      | 262          | 0.7      |
| Mauritius        | Port Louis         | 207          | 0.5      |
| Chile            | Punta Arenas       | 196          | 0.5      |
| Uruguay          | La Paloma          | 194          | 0.5      |

**b**

| <b>Country</b> | <b>Port</b>   | <b>Trips</b> | <b>%</b> |
|----------------|---------------|--------------|----------|
| Peru           | Callao        | 5,442        | 19.6     |
| Peru           | Pisco         | 4,082        | 14.7     |
| Peru           | Chimbote      | 3,720        | 13.4     |
| Peru           | Coishco       | 3,162        | 11.4     |
| Peru           | Chicama       | 2,661        | 9.6      |
| Peru           | Chancay       | 1,592        | 5.7      |
| Peru           | Supe          | 1,376        | 4.9      |
| Peru           | Vegueta       | 1,359        | 4.9      |
| Peru           | La Pampilla   | 1,022        | 3.7      |
| Peru           | Tambo De Mora | 968          | 3.5      |
| Peru           | Huacho        | 471          | 1.7      |
| Peru           | Samanco       | 416          | 1.5      |
| Chile          | Punta Arenas  | 283          | 1.0      |
| Ecuador        | Manta         | 191          | 0.7      |

|                  |                 |     |     |
|------------------|-----------------|-----|-----|
| Peru             | La Punta        | 167 | 0.6 |
| Peru             | Tierra Colorada | 146 | 0.5 |
| China            | Zhoushan        | 112 | 0.4 |
| Peru             | Bayovar         | 55  | 0.2 |
| Ecuador          | Posorja         | 43  | 0.2 |
| French Polynesia | Papeete         | 41  | 0.1 |

**c**

| <b>Country</b> | <b>Port</b>     | <b>Trips</b> | <b>%</b> |
|----------------|-----------------|--------------|----------|
| Sri Lanka      | Colombo         | 397          | 36.7     |
| Seychelles     | Victoria        | 151          | 14.0     |
| Mauritius      | Port Louis      | 138          | 12.8     |
| Singapore      | Singapore       | 126          | 11.6     |
| Sri Lanka      | Negombo         | 83           | 7.7      |
| Taiwan         | Kaohsiung       | 35           | 3.2      |
| Thailand       | Phuket          | 29           | 2.7      |
| Sri Lanka      | Hendala         | 24           | 2.2      |
| Thailand       | Ko He           | 20           | 1.8      |
| Indonesia      | Nipah Anchorage | 15           | 1.4      |
| China          | Zhoushan        | 12           | 1.1      |

**d**

| <b>Country</b> | <b>Port</b>  | <b>Trips</b> | <b>%</b> |
|----------------|--------------|--------------|----------|
| Western Sahara | Dakhla       | 7,400        | 42.2     |
| Mauritania     | Nouadhibou   | 4,071        | 23.2     |
| Senegal        | Dakar        | 3,339        | 19.0     |
| Guinea         | Conakry      | 443          | 2.5      |
| Guinea-Bissau  | Bissau       | 438          | 2.5      |
| Cape Verde     | Porto Grande | 412          | 2.3      |
| Sierra Leone   | Freetown     | 256          | 1.5      |
| Spain          | Las Palmas   | 185          | 1.1      |
| Côte d'Ivoire  | Port Bouet   | 142          | 0.8      |
| Côte d'Ivoire  | Abidjan      | 106          | 0.6      |
| Mauritania     | Nouakchott   | 90           | 0.5      |
| Brazil         | Natal        | 78           | 0.4      |
| Morocco        | Agadir       | 57           | 0.3      |
| Ghana          | Tema         | 56           | 0.3      |
| Senegal        | Ziguinchor   | 51           | 0.3      |
| Spain          | Argineguin   | 45           | 0.3      |
| Liberia        | Monrovia     | 44           | 0.3      |
| Spain          | Cangas       | 40           | 0.2      |
| South Africa   | Cape Town    | 40           | 0.2      |

|        |        |    |     |
|--------|--------|----|-----|
| Gambia | Banjul | 32 | 0.2 |
|--------|--------|----|-----|

**e**

| <b>Country</b> | <b>Port</b>          | <b>Trips</b> | <b>%</b> |
|----------------|----------------------|--------------|----------|
| Portugal       | Horta                | 1,410        | 15.5     |
| Portugal       | Ponta Delgada        | 1,317        | 14.4     |
| Spain          | Vigo                 | 1,167        | 12.8     |
| Spain          | Cangas               | 1,012        | 11.1     |
| Portugal       | Praia De Vitoria     | 963          | 10.6     |
| Portugal       | Peniche              | 573          | 6.3      |
| Portugal       | Vila Do Porto        | 406          | 4.5      |
| Portugal       | Vila Franca Do Campo | 267          | 2.9      |
| Portugal       | Madalena             | 238          | 2.6      |
| Spain          | Aviles               | 226          | 2.5      |
| Spain          | La Coruna            | 146          | 1.6      |
| Spain          | San Ciprian          | 145          | 1.6      |
| Spain          | Burela               | 119          | 1.3      |
| Portugal       | Sesimbra             | 119          | 1.3      |
| Portugal       | Praia                | 84           | 0.9      |
| Portugal       | Leixoes              | 83           | 0.9      |
| Spain          | Gijon                | 73           | 0.8      |
| Spain          | Bermeo               | 67           | 0.7      |
| Portugal       | Velas                | 61           | 0.7      |
| Spain          | Nerga                | 60           | 0.7      |

**f**

| <b>Country</b> | <b>Port</b>   | <b>Trips</b> | <b>%</b> |
|----------------|---------------|--------------|----------|
| Ecuador        | Manta         | 237          | 20.6     |
| Peru           | Chimbote      | 221          | 19.2     |
| Peru           | Callao        | 145          | 12.6     |
| Chile          | Punta Arenas  | 120          | 10.4     |
| China          | Zhoushan      | 99           | 8.6      |
| Panama         | Vacamonte     | 47           | 4.1      |
| Ecuador        | Posorja       | 35           | 3.0      |
| Colombia       | Cartagena     | 33           | 2.9      |
| South Korea    | Busan         | 28           | 2.4      |
| China          | Fuzhou        | 25           | 2.2      |
| China          | Weihai        | 16           | 1.4      |
| Mexico         | Puerto Madero | 12           | 1.0      |
| Singapore      | Singapore     | 10           | 0.9      |

**Supplementary Table 10.** Top 20 destination ports in high-risk regions for IUU fishing (with number of trips  $\geq 10$ ) for regions identified in Supplementary Figure 5: **(a)** Southwest Atlantic, **(b)** Humboldt Current, **(c)** Western Indian Ocean, **(d)** West Africa, **(e)** around the Azores, and **(f)** around the Galapagos Islands. Port names are from Global Fishing Watch.

**a**

| <b>Country</b>   | <b>Port</b>        | <b>Trips</b> | <b>%</b> |
|------------------|--------------------|--------------|----------|
| Uruguay          | Montevideo         | 9,453        | 23.7     |
| Argentina        | Mar Del Plata      | 7,571        | 19.0     |
| Argentina        | Puerto Madryn      | 5,575        | 14.0     |
| Argentina        | Puerto Deseado     | 3,709        | 9.3      |
| Argentina        | Camarones          | 2,154        | 5.4      |
| Brazil           | Rio Grande         | 1,851        | 4.6      |
| Falkland Islands | Stanley            | 1,319        | 3.3      |
| Falkland Islands | Berkeley Sound     | 1,096        | 2.7      |
| Argentina        | Comodoro Rivadavia | 988          | 2.5      |
| Argentina        | San Antonio Este   | 874          | 2.2      |
| Argentina        | Puerto Rawson      | 788          | 2.0      |
| Argentina        | Caleta Paula       | 555          | 1.4      |
| Uruguay          | Recalada           | 462          | 1.2      |
| Uruguay          | Punta Del Este     | 420          | 1.1      |
| Brazil           | Itajai             | 315          | 0.8      |
| South Africa     | Cape Town          | 283          | 0.7      |
| Argentina        | Caleta Olivia      | 262          | 0.7      |
| Mauritius        | Port Louis         | 207          | 0.5      |
| Uruguay          | La Paloma          | 194          | 0.5      |
| Chile            | Punta Arenas       | 193          | 0.5      |

**b**

| <b>Country</b> | <b>Port</b>   | <b>Trips</b> | <b>%</b> |
|----------------|---------------|--------------|----------|
| Peru           | Callao        | 5,428        | 19.7     |
| Peru           | Pisco         | 4,080        | 14.8     |
| Peru           | Chimbote      | 3,717        | 13.5     |
| Peru           | Coishco       | 3,159        | 11.5     |
| Peru           | Chicama       | 2,632        | 9.6      |
| Peru           | Chancay       | 1,592        | 5.8      |
| Peru           | Supé          | 1,376        | 5.0      |
| Peru           | Vegueta       | 1,359        | 4.9      |
| Peru           | La Pampilla   | 1,021        | 3.7      |
| Peru           | Tambo De Mora | 966          | 3.5      |
| Peru           | Huacho        | 471          | 1.7      |
| Peru           | Samanco       | 416          | 1.5      |
| Chile          | Punta Arenas  | 282          | 1.0      |
| Ecuador        | Manta         | 181          | 0.7      |

|         |                 |     |     |
|---------|-----------------|-----|-----|
| Peru    | Tierra Colorada | 137 | 0.5 |
| China   | Zhoushan        | 109 | 0.4 |
| Peru    | La Punta        | 71  | 0.3 |
| Peru    | Bayovar         | 54  | 0.2 |
| Ecuador | Posorja         | 43  | 0.2 |
| Peru    | Huarmey         | 39  | 0.1 |

**c**

| <b>Country</b> | <b>Port</b>     | <b>Trips</b> | <b>%</b> |
|----------------|-----------------|--------------|----------|
| Mauritius      | Port Louis      | 2,038        | 37.3     |
| Réunion        | Port Ouest      | 1,210        | 22.1     |
| Sri Lanka      | Colombo         | 409          | 7.5      |
| Seychelles     | Victoria        | 341          | 6.2      |
| Madagascar     | Toamasina       | 254          | 4.6      |
| Singapore      | Singapore       | 221          | 4.0      |
| South Africa   | Durban          | 113          | 2.1      |
| South Africa   | Cape Town       | 86           | 1.6      |
| Taiwan         | Kaohsiung       | 82           | 1.5      |
| Sri Lanka      | Negombo         | 80           | 1.5      |
| Réunion        | Reunion         | 79           | 1.4      |
| Indonesia      | Tanjung Benoa   | 59           | 1.1      |
| Mozambique     | Maputo          | 42           | 0.8      |
| Madagascar     | Tamatave        | 35           | 0.6      |
| Thailand       | Phuket          | 30           | 0.5      |
| China          | Zhoushan        | 28           | 0.5      |
| Mozambique     | Beira           | 28           | 0.5      |
| Sri Lanka      | Hendala         | 26           | 0.5      |
| Madagascar     | Portl Ehoala    | 25           | 0.5      |
| Indonesia      | Nipah Anchorage | 20           | 0.4      |
| Thailand       | Ko He           | 20           | 0.4      |

**d**

| <b>Country</b> | <b>Port</b>  | <b>Trips</b> | <b>%</b> |
|----------------|--------------|--------------|----------|
| Western Sahara | Dakhla       | 7,400        | 42.5     |
| Mauritania     | Nouadhibou   | 4,070        | 23.4     |
| Senegal        | Dakar        | 3,331        | 19.1     |
| Guinea         | Conakry      | 443          | 2.5      |
| Guinea-Bissau  | Bissau       | 438          | 2.5      |
| Cape Verde     | Porto Grande | 379          | 2.2      |
| Sierra Leone   | Freetown     | 255          | 1.5      |
| Spain          | Las Palmas   | 182          | 1.0      |
| Côte d'Ivoire  | Port Bouet   | 121          | 0.7      |



|               |            |    |     |
|---------------|------------|----|-----|
| Côte d'Ivoire | Abidjan    | 94 | 0.5 |
| Mauritania    | Nouakchott | 90 | 0.5 |
| Morocco       | Agadir     | 57 | 0.3 |
| Brazil        | Natal      | 54 | 0.3 |
| Senegal       | Ziguinchor | 51 | 0.3 |
| Ghana         | Tema       | 50 | 0.3 |
| Liberia       | Monrovia   | 44 | 0.3 |
| Spain         | Argineguin | 41 | 0.2 |
| Spain         | Cangas     | 40 | 0.2 |
| South Africa  | Cape Town  | 39 | 0.2 |
| Gambia        | Banjul     | 32 | 0.2 |

e

| <b>Country</b> | <b>Port</b>          | <b>Trips</b> | <b>%</b> |
|----------------|----------------------|--------------|----------|
| Portugal       | Horta                | 1,172        | 15.8     |
| Spain          | Vigo                 | 1,092        | 14.8     |
| Spain          | Cangas               | 961          | 13.0     |
| Portugal       | Praia De Vitoria     | 905          | 12.2     |
| Portugal       | Ponta Delgada        | 708          | 9.6      |
| Portugal       | Peniche              | 496          | 6.7      |
| Spain          | Aviles               | 225          | 3.0      |
| Portugal       | Madalena             | 214          | 2.9      |
| Portugal       | Vila Do Porto        | 175          | 2.4      |
| Spain          | San Ciprian          | 145          | 2.0      |
| Spain          | La Coruna            | 143          | 1.9      |
| Spain          | Burela               | 112          | 1.5      |
| Portugal       | Sesimbra             | 108          | 1.5      |
| Portugal       | Praia                | 83           | 1.1      |
| Portugal       | Leixoes              | 79           | 1.1      |
| Spain          | Gijon                | 68           | 0.9      |
| Spain          | Bermeo               | 66           | 0.9      |
| Portugal       | Vila Franca Do Campo | 66           | 0.9      |
| Portugal       | Velas                | 61           | 0.8      |
| Spain          | Nerga                | 54           | 0.7      |

f

| <b>Country</b> | <b>Port</b>  | <b>Trips</b> | <b>%</b> |
|----------------|--------------|--------------|----------|
| Ecuador        | Manta        | 229          | 20.4     |
| Peru           | Chimbote     | 221          | 19.7     |
| Peru           | Callao       | 141          | 12.6     |
| Chile          | Punta Arenas | 120          | 10.7     |
| China          | Zhoushan     | 99           | 8.8      |

---

|             |               |    |     |
|-------------|---------------|----|-----|
| Panama      | Vacamonte     | 41 | 3.7 |
| Ecuador     | Posorja       | 34 | 3.0 |
| Colombia    | Cartagena     | 33 | 2.9 |
| South Korea | Busan         | 26 | 2.3 |
| China       | Fuzhou        | 25 | 2.2 |
| China       | Weihai        | 16 | 1.4 |
| Mexico      | Puerto Madero | 11 | 1.0 |
| Singapore   | Singapore     | 10 | 0.9 |

---

**Supplementary Table 11.** Proportion of gear types in high-risk regions for labor abuse based on total fishing hours (2012–2019) for regions identified in Supplementary Figure 5: **(a)** Southwest Atlantic, **(b)** Humboldt Current, **(c)** around Maldives, **(d)** West Africa, **(e)** around the Azores, and **(f)** around the Galapagos Islands.

**a**

| <b>Gear</b>   | <b>Proportion</b> |
|---------------|-------------------|
| Trawlers      | 0.83              |
| Squid jiggers | 0.12              |
| Other         | 0.05              |

**b**

| <b>Gear</b>  | <b>Proportion</b> |
|--------------|-------------------|
| Purse seines | 0.94              |
| Other        | 0.06              |

**c**

| <b>Gear</b>        | <b>Proportion</b> |
|--------------------|-------------------|
| Drifting longlines | 0.93              |
| Other              | 0.07              |

**d**

| <b>Gear</b>  | <b>Proportion</b> |
|--------------|-------------------|
| Trawlers     | 0.72              |
| Purse seines | 0.18              |
| Other        | 0.10              |

**e**

| <b>Gear</b>        | <b>Proportion</b> |
|--------------------|-------------------|
| Drifting longlines | 0.51              |
| Pole and line      | 0.31              |
| Set longlines      | 0.10              |
| Other              | 0.08              |

**f**

| <b>Gear</b>   | <b>Proportion</b> |
|---------------|-------------------|
| Squid jiggers | 0.54              |
| Purse seines  | 0.32              |
| Other         | 0.14              |

**Supplementary Table 12.** Proportion of gear types in high-risk regions for IUU fishing based on total fishing hours (2012–2019) for regions identified in Supplementary Figure 5: **(a)** Southwest Atlantic, **(b)** Humboldt Current, **(c)** Western Indian Ocean, **(d)** West Africa, **(e)** around the Azores, and **(f)** around the Galapagos Islands

**a**

| <b>Gear</b>   | <b>Proportion</b> |
|---------------|-------------------|
| Trawlers      | 0.83              |
| Squid jiggers | 0.12              |
| Other         | 0.05              |

**b**

| <b>Gear</b>  | <b>Proportion</b> |
|--------------|-------------------|
| Purse seines | 0.95              |
| Other        | 0.05              |

**c**

| <b>Gear</b>        | <b>Proportion</b> |
|--------------------|-------------------|
| Drifting longlines | 0.87              |
| Set longlines      | 0.05              |
| Other              | 0.08              |

**e**

| <b>Gear</b>  | <b>Proportion</b> |
|--------------|-------------------|
| Trawlers     | 0.72              |
| Purse seines | 0.18              |
| Other        | 0.10              |

**f**

| <b>Gear</b>        | <b>Proportion</b> |
|--------------------|-------------------|
| Drifting longlines | 0.58              |
| Pole and line      | 0.23              |
| Set longlines      | 0.11              |
| Other              | 0.09              |

**g**

| <b>Gear</b>   | <b>Proportion</b> |
|---------------|-------------------|
| Squid jiggers | 0.55              |
| Purse seines  | 0.32              |
| Other         | 0.13              |

## Supplementary Note 1

### *Robustness of port risk assessment*

Overall, subsampling port risk scores from the port risk assessment did not substantially affect the results of variable importance and the effects on port risk score (Supplementary Figure 4). For fishing trips, different subsamples resulted in similar patterns of variable importance on the risk of labor abuse (ICC = 0.977,  $F_{5, 53.9} = 445$  for 10% drop, ICC = 0.948,  $F_{5, 53.8} = 188$  for 20% drop;  $p < 0.001$  for both) and risk of IUU fishing (ICC = 0.986,  $F_{5, 52.1} = 768$  for 10% drop, ICC = 0.986,  $F_{5, 51.1} = 795$  for 20% drop;  $p < 0.001$  for both), with greater importance of flag groups and gear types. The effects of variables on risk of labor abuse agreed among subsamples (ICC = 0.983,  $F_{4, 40.9} = 701$  for 10% drop, ICC = 0.942,  $F_{4, 39.6} = 201$  for 20% drop for flag groups; ICC = 0.966,  $F_{8, 36.5} = 475$  for 10% drop, ICC = 0.924,  $F_{8, 50.7} = 168$  for 20% drop for gear types;  $p < 0.001$  for all). Similarly, flag groups and gear types showed similar effects on risk of IUU fishing (ICC = 0.985,  $F_{4, 32.4} = 983$  for 10% drop, ICC = 0.967,  $F_{4, 43.5} = 267$  for 20% drop for flag groups; ICC = 0.958,  $F_{8, 29.6} = 431$  for 10% drop, ICC = 0.952,  $F_{8, 34.0} = 339$  for 20% drop for gear types;  $p < 0.001$  for all).

For transshipment, the random subsamples agreed on patterns of variable importance on risk of labor abuse (ICC = 0.971,  $F_{14, 115} = 379$  for 10% drop, ICC = 0.970,  $F_{14, 108} = 372$  for 20% drop;  $p < 0.001$  for both) and risk of IUU fishing (ICC = 0.985,  $F_{14, 76.8} = 870$  for 10% drop, ICC = 0.969,  $F_{14, 104} = 370$  for 20% drop;  $p < 0.001$  for both). Agreement was also attained in the effects of flag groups (ICC = 0.951,  $F_{4, 42.1} = 223$  for 10% drop for labor abuse, ICC = 0.932,  $F_{4, 43.2} = 203$  for 20% drop for labor abuse; ICC = 0.980,  $F_{4, 41.1} = 577$  for 10% drop for IUU fishing, ICC = 0.953,  $F_{4, 44.3} = 216$  for 20% drop for IUU fishing;  $p < 0.001$  for all) and gear types (ICC = 0.914,  $F_{5, 54} = 107$  for 10% drops labor abuse, ICC = 0.864,  $F_{5, 43.3} = 83.5$  for 20% drop labor abuse; ICC = 0.961,  $F_{5, 36.9} = 355$  for 10% drop for IUU fishing, ICC = 0.929,  $F_{5, 33.2} = 204$  for 20% drop for IUU fishing;  $p < 0.001$  for all).

## Supplementary References

- 1 Ford, J. H. & Wilcox, C. Shedding light on the dark side of maritime trade – A new approach for identifying countries as flags of convenience. *Marine Policy* **99**, 298-303, doi:<https://doi.org/10.1016/j.marpol.2018.10.026> (2019).
- 2 International Transport Workers' Federation. *Flags of Convenience*, 2020).
